# Supplementary material for: Recruiting adult participants to physical activity intervention studies using sport: a systematic review
Source: PubMed Central journal article supplement (PMC5530105; doi:10.1136/bmjsem-2017-000231), 2017-07-11
Supplement: bmjsem-2017-000231supp002.pdf [file bmjsem-2017-000231supp002.pdf]

## SUPPLEMENTARY INFORMATION

### Appendix (i) Search syntax for electronic databases

| Search ID | Search Terms              |
|-----------|---------------------------|
| 1         | intervention              |
| 2         | (MH "Sports")             |
| 3         | aikido                    |
| 4         | air sports                |
| 5         | american football         |
| 6         | angling                   |
| 7         | archery                   |
| 8         | arm wrestling             |
| 9         | athletics                 |
| 10        | australian rules football |
| 11        | badminton                 |
| 12        | baseball                  |
| 13        | basketball                |
| 14        | baton twirling            |
| 15        | biathlon                  |
| 16        | billiards OR snooker      |
| 17        | bobsleigh                 |
| 18        | boccia                    |
| 19        | bowls                     |
| 20        | boxing                    |
| 21        | camogie                   |
| 22        | canoeing                  |
| 23        | caving                    |
| 24        | chinese martial arts      |
| 25        | cricket                   |
| 26        | croquet                   |
| 27        | curling                   |
| 28        | cycling                   |
| 29        | darts                     |
| 30        | disability sport          |
| 31        | dodgeball                 |
| 32        | dragon boat racing        |
| 33        | equestrian                |
| 34        | (MH "Exercise")           |
| 35        | fitness                   |

|    |                             |
|----|-----------------------------|
| 36 | dance                       |
| 37 | fencing                     |
| 38 | racket OR racquet           |
| 39 | floorball                   |
| 40 | football                    |
| 41 | gaelic games                |
| 42 | golf                        |
| 43 | gymnastics                  |
| 44 | handball                    |
| 45 | highland games              |
| 46 | hockey                      |
| 47 | hovering                    |
| 48 | ice hockey                  |
| 49 | ice skating                 |
| 50 | judo                        |
| 51 | ju jitsu                    |
| 52 | kabbadi                     |
| 53 | karate                      |
| 54 | kendo                       |
| 55 | kite surfing                |
| 56 | korfball                    |
| 57 | lacrosse                    |
| 58 | life saving                 |
| 59 | luge                        |
| 60 | pentathlon                  |
| 61 | motor cycling               |
| 62 | motorsports OR motor sports |
| 63 | mountaineering              |
| 64 | netball                     |
| 65 | orienteering                |
| 66 | petanque                    |
| 67 | polo                        |
| 68 | pool                        |
| 69 | quoits                      |
| 70 | rambling                    |
| 71 | real tennis                 |
| 72 | roller sports               |
| 73 | rounders                    |
| 74 | rowing                      |
| 75 | rugby                       |

|     |                                                                                                                                                                                                                                                                                                                                                                                                                                                                                                                                                                                                                        |
|-----|------------------------------------------------------------------------------------------------------------------------------------------------------------------------------------------------------------------------------------------------------------------------------------------------------------------------------------------------------------------------------------------------------------------------------------------------------------------------------------------------------------------------------------------------------------------------------------------------------------------------|
| 76  | sailing                                                                                                                                                                                                                                                                                                                                                                                                                                                                                                                                                                                                                |
| 77  | yachting                                                                                                                                                                                                                                                                                                                                                                                                                                                                                                                                                                                                               |
| 78  | shinty                                                                                                                                                                                                                                                                                                                                                                                                                                                                                                                                                                                                                 |
| 79  | shooting                                                                                                                                                                                                                                                                                                                                                                                                                                                                                                                                                                                                               |
| 80  | skateboarding                                                                                                                                                                                                                                                                                                                                                                                                                                                                                                                                                                                                          |
| 81  | skipping                                                                                                                                                                                                                                                                                                                                                                                                                                                                                                                                                                                                               |
| 82  | snowsport OR skiing OR snowboarding                                                                                                                                                                                                                                                                                                                                                                                                                                                                                                                                                                                    |
| 83  | softball                                                                                                                                                                                                                                                                                                                                                                                                                                                                                                                                                                                                               |
| 84  | sombo                                                                                                                                                                                                                                                                                                                                                                                                                                                                                                                                                                                                                  |
| 85  | squash                                                                                                                                                                                                                                                                                                                                                                                                                                                                                                                                                                                                                 |
| 86  | stoolball                                                                                                                                                                                                                                                                                                                                                                                                                                                                                                                                                                                                              |
| 87  | sub aqua                                                                                                                                                                                                                                                                                                                                                                                                                                                                                                                                                                                                               |
| 88  | surfing                                                                                                                                                                                                                                                                                                                                                                                                                                                                                                                                                                                                                |
| 89  | surf life saving                                                                                                                                                                                                                                                                                                                                                                                                                                                                                                                                                                                                       |
| 90  | swimming                                                                                                                                                                                                                                                                                                                                                                                                                                                                                                                                                                                                               |
| 91  | table tennis                                                                                                                                                                                                                                                                                                                                                                                                                                                                                                                                                                                                           |
| 92  | taekwondo                                                                                                                                                                                                                                                                                                                                                                                                                                                                                                                                                                                                              |
| 93  | tang soo do                                                                                                                                                                                                                                                                                                                                                                                                                                                                                                                                                                                                            |
| 94  | bowling                                                                                                                                                                                                                                                                                                                                                                                                                                                                                                                                                                                                                |
| 95  | tennis                                                                                                                                                                                                                                                                                                                                                                                                                                                                                                                                                                                                                 |
| 96  | triathlon                                                                                                                                                                                                                                                                                                                                                                                                                                                                                                                                                                                                              |
| 97  | tug of war                                                                                                                                                                                                                                                                                                                                                                                                                                                                                                                                                                                                             |
| 98  | ultimate frisbee                                                                                                                                                                                                                                                                                                                                                                                                                                                                                                                                                                                                       |
| 99  | volleyball                                                                                                                                                                                                                                                                                                                                                                                                                                                                                                                                                                                                             |
| 100 | water skiing                                                                                                                                                                                                                                                                                                                                                                                                                                                                                                                                                                                                           |
| 101 | weight lifting OR weightlifting                                                                                                                                                                                                                                                                                                                                                                                                                                                                                                                                                                                        |
| 102 | wrestling                                                                                                                                                                                                                                                                                                                                                                                                                                                                                                                                                                                                              |
| 103 | yoga                                                                                                                                                                                                                                                                                                                                                                                                                                                                                                                                                                                                                   |
| 104 | recruit*                                                                                                                                                                                                                                                                                                                                                                                                                                                                                                                                                                                                               |
| 105 | participat*                                                                                                                                                                                                                                                                                                                                                                                                                                                                                                                                                                                                            |
| 106 | market*                                                                                                                                                                                                                                                                                                                                                                                                                                                                                                                                                                                                                |
| 107 | 2 OR 3 OR 4 OR 5 OR 6 OR 7 OR 8 OR 9 OR 10 OR 11 OR 12 OR 13 OR 14 OR 15 OR 16 OR 17 OR 18 OR 19 OR 20 OR 21 OR 22 OR 23 OR 24 OR 25 OR 26 OR 27 OR 28 OR 29 OR 30 OR 31 OR 32 OR 33 OR 34 OR 35 OR 36 OR 37 OR 38 OR 39 OR 40 OR 41 OR 42 OR 43 OR 44 OR 45 OR 46 OR 47 OR 48 OR 49 OR 50 OR 51 OR 52 OR 53 OR 54 OR 55 OR 56 OR 57 OR 58 OR 59 OR 60 OR 61 OR 62 OR 63 OR 64 OR 65 OR 66 OR 67 OR 68 OR 69 OR 70 OR 71 OR 72 OR 73 OR 74 OR 75 OR 76 OR 78 OR 79 OR 80 OR 81 OR 82 OR 83 OR 84 OR 85 OR 86 OR 87 OR 88 OR 89 OR 90 OR 91 OR 92 OR 93 OR 94 OR 95 OR 96 OR 97 OR 98 OR 99 OR 100 OR 101 OR 102 OR 103 |
| 108 | 104 OR 105 OR 106                                                                                                                                                                                                                                                                                                                                                                                                                                                                                                                                                                                                      |
| 109 | 1 AND 107 AND 108 limited to English language and adults (19+ years)                                                                                                                                                                                                                                                                                                                                                                                                                                                                                                                                                   |
