# Supplementary material for: Recruiting adult participants to physical activity intervention studies using sport: a systematic review
Source: PubMed Central journal article supplement (PMC5530105; doi:10.1136/bmjsem-2017-000231), 2017-07-11
Supplement: bmjsem-2017-000231supp003.pdf [file bmjsem-2017-000231supp003.pdf]

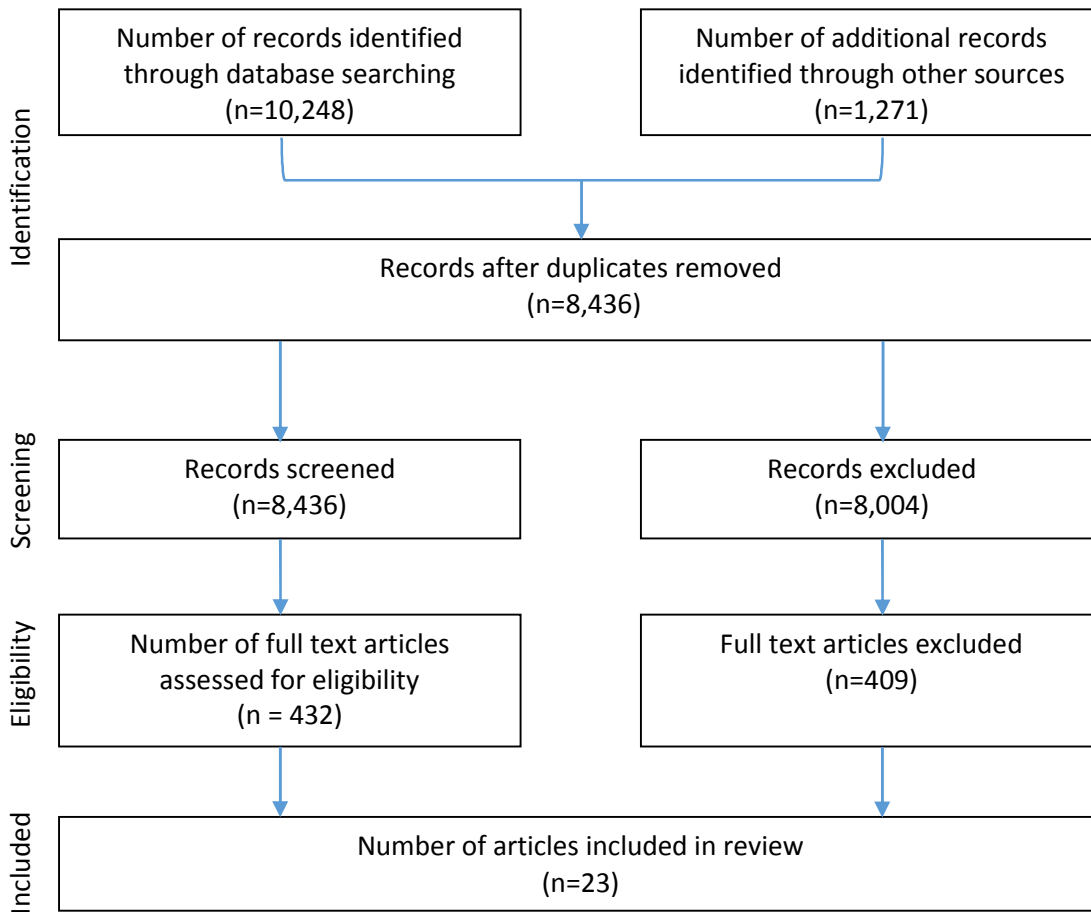

Figure 1. Review flowchart
